# Supplementary material for: Puberty and fertility in classic galactosemia
Source: PubMed Central journal article supplement — Endocr Connect. 2021 Jan 20;10(2):240–7. doi: 10.1530/EC-21-0013 (PMC7983486; doi:10.1530/ec-21-0013), 2021-01-20
Supplement: supplementary_material.pdf [file supplementary_material.pdf]

## QUESTIONNAIRE FOR GALACTOSEMIC PATIENTS

Date of collection : \_\_\_\_/\_\_\_\_/\_\_\_\_

1/5

### Family medical history and genetics:

- Year of birth of your mother : \_\_\_\_ Age of your mother's first period : \_\_\_\_
- Your mother's height : \_\_\_\_\_
- Your mother's education level and occupation : \_\_\_\_\_
  
- Year of birth of your father : \_\_\_\_
- Your father's height : \_\_\_\_\_
- Your father's education level and occupation : \_\_\_\_\_
  
- Did one of your parents have fertility problems: mother  yes  no  
father  yes  no
- Number of siblings: \_\_\_\_brothers \_\_\_\_sisters
- Age and size of your siblings : Sisters : \_\_\_\_\_  
Brothers : \_\_\_\_\_
  
- Do you have a parent, sibling or other relative with galactosemia ?  
 yes  no If yes, which one(s)? \_\_\_\_\_
  
- as there been an identified genetic mutation in you or your family?  yes  no  
If so, which one? \_\_\_\_\_

### If you are a woman with Galactosemia, complete below:

- Height : \_\_\_\_ weight : \_\_\_\_
- Age at the beginning of breast development:  
\_\_\_\_years \_\_\_\_months
- Age of the first period : \_\_\_\_years \_\_\_\_months
- Did the periods appear spontaneously or under treatment?:  
 spontaneously  under treatment
- Are your periods regular ?  yes  no  
Are you taking a treatment to regularize your periods?  yes  no  
Please specify : \_\_\_\_\_
  
- Has an ovarian cryopreservation been performed :  
 yes  no If so, when : \_\_\_\_\_

### If you are a man with Galactosemia, complete below:

- Height : \_\_\_\_ weight : \_\_\_\_
- Have you had testicular descent surgery?  
 yes  no
- If so which side?  
 left  right
  
- Age at first signs of puberty :  
\_\_\_\_years \_\_\_\_months

- If you are a woman with Galactosemia, complete below :
- Do you have children?  yes  no

**If you have children :**

How many children? \_\_\_\_\_

Specify the year(s) of birth: \_\_\_\_\_

- Was the pregnancy(s) spontaneous?  yes  no If so, how many : \_\_\_\_\_
- What was the timeframe to get pregnant ?  
 <6 months  6 to 12 months  1 to 2 years  > 2 years
- Have you had miscarriages?  yes  no If so, how many ? \_\_\_\_\_
- Did you receive any medication to get pregnant ?  yes  no  
 If so, what type ? \_\_\_\_\_
- Have you used in vitro fertilization?  yes  no  
 Number of attempts: \_\_\_\_\_ Number of successes: \_\_\_\_\_
- Have you used oocyte donation?  yes  no  
 Number of attempts: \_\_\_\_\_ Number of successes: \_\_\_\_\_

**If you do not have children :**

- Have you ever attempted to get pregnant?  yes  no  
 If yes, answer the following questions:

- For how long did it take you to try to get pregnant without treatment?  
 <6 months  6 to 12 months  1 to 2 years  > 2 years
- Have you had miscarriages?  yes  no If so, how many ? \_\_\_\_\_
- Did you receive any medication to try to get pregnant ?  yes  no  
 If so, what type ? \_\_\_\_\_
- Have you used in vitro fertilization?  yes  no  
 Number of attempts: \_\_\_\_\_ Number of successes: \_\_\_\_\_
- Have you used oocyte donation?  yes  no  
 Number of attempts: \_\_\_\_\_ Number of successes: \_\_\_\_\_

- Age of your partner : \_\_\_\_\_
- Has your partner undergone any special treatment for fertility problems?  
 yes  no If yes, specify which treatment(s) : \_\_\_\_\_
- Does your partner have any health problems?  yes  no If yes, which ones : \_\_\_\_\_
- Has your partner ever had children from a previous union?  yes  no  
 If yes, number of children: \_\_\_\_\_

▪ If you are a man with Galactosemia, complete below :

▪ Do you have children ?  yes  no

**If you have children :**

How many children? \_\_\_\_\_

Specify the year(s) of birth: \_\_\_\_\_

▪ What was the timeframe for the conception(s):  <6 months  6 to 12 months  1 to 2 years  > 2 years

▪ Do you have an identified fertility problem?  yes  no

If yes, specify : \_\_\_\_\_

▪ Have you taken any special treatment for fertility problems?  yes  no

If yes, specify which treatment(s): \_\_\_\_\_

**If you do not have children :**

▪ Did you ever try to conceive a child ?  yes  no

If yes, answer the following questions:

▪ For how long did it take you to try to conceive without treatment?

<6 months  6 to 12 months  1 to 2 years  > 2 years

▪ Do you have an identified fertility problem?  yes  no

If yes, specify : \_\_\_\_\_

▪ Have you taken any special treatment for fertility problems?  yes  no

If yes, specify which treatment(s): \_\_\_\_\_

▪ Age of your partner : \_\_\_\_\_

▪ Has your partner undergone any special treatment for fertility problems?

yes  no If yes, specify which treatment(s) : \_\_\_\_\_

▪ Has your partner used in vitro fertilization?  yes  no

Number of attempts: \_\_\_\_\_ Number of successes: \_\_\_\_\_

▪ Does your partner have any health problems?  yes  no If yes, which ones : \_\_\_\_\_

▪ Has your partner ever had children from a previous union?  yes  no

If yes, number of children: \_\_\_\_\_

**To be completed for women and men with Galactosemia :**

- Are you undergoing long-term treatments?  yes  no

If yes, which one(s): \_\_\_\_\_

- Do you have complications from galactosemia?  yes  no

Specify the complication(s) with the age of onset (ophthalmic disease, epilepsy, language disorders, motor disorders, etc.....)

| Complications | Age of onset             |
|---------------|--------------------------|
|               | _____ years _____ months |

- Latest intraerythrocytic galactose level: \_\_\_\_\_ Date : \_\_\_\_\_

- Have you had FSH, LH, AMH (Antimullerian Hormone), prolactin?

If yes, when and what were the last results?

\_\_\_\_\_

- Do you follow the recommended diet:  yes  no

- Do you smoke?  yes  no If yes, how many cigarettes per day? \_\_\_\_\_

- Are you concerned by the following risk factors:

|                     | yes | no |
|---------------------|-----|----|
| Diabetes            |     |    |
| High blood pressure |     |    |
| High cholesterol    |     |    |

- Do you have any other health problems (surgeries, accidents, long term medication....)?

\_\_\_\_\_

- Who are you?

- Level of studies : \_\_\_\_\_
- Profession : \_\_\_\_\_

- Marital status:  married  single  married life
